# Supplementary material for: "I can't live like that": The experience of caregiver stress of caring for a relative with substance use disorder
Source: Research Square preprint supplement (doi:10.21203/rs.3.rs-66075/v2), 2021-01-13
Supplement: Supplementary file 1 [file a73db70483f3b358c08fec98.docx]

**Appendix 1: Interviewer guide**

1. Demographic information
   1. Name, age, ethnicity, occupation?
   2. How would you describe yourself?
   3. Any information that is relevant to substance use and addiction?
   4. What were your growing up experiences?
   5. Past experiences with substance use?
2. Loved one affected by addiction
   1. What type of addiction does he/she contend with?
   2. History and trajectory of addiction?
   3. Family involvement in addiction treatment of the loved one?
3. Impact of addiction
   1. Impact of addiction on the loved one?
   2. Impact of addiction on the family?
   3. How has addiction in your family affected you?
      1. Socially
      2. Financially
      3. Physically
      4. Psychological
      5. socially
4. Do you consider yourself in need of professional help to deal with addiction in your family?
   1. If so, what type of help?
   2. Have you sought professional help to deal with addiction in your family?
5. Do you have any needs that you would like to be met to help you deal with addiction in your family?
6. What resources might you need to live well and support your loved one living with addiction?
   1. How would they look like?
   2. What should we include?
